# Supplementary material
Source: ML conference proceedings conference paper supplement (https://openreview.net/forum?id=r8t6OsLP2s)

**Time-average Error**

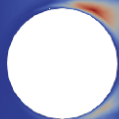

**Time-average Temporal Difference**

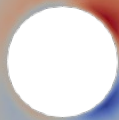

**Time-average Sampled Frequency**

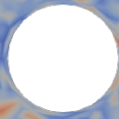

Supplement: supplementary_material [file attachment]

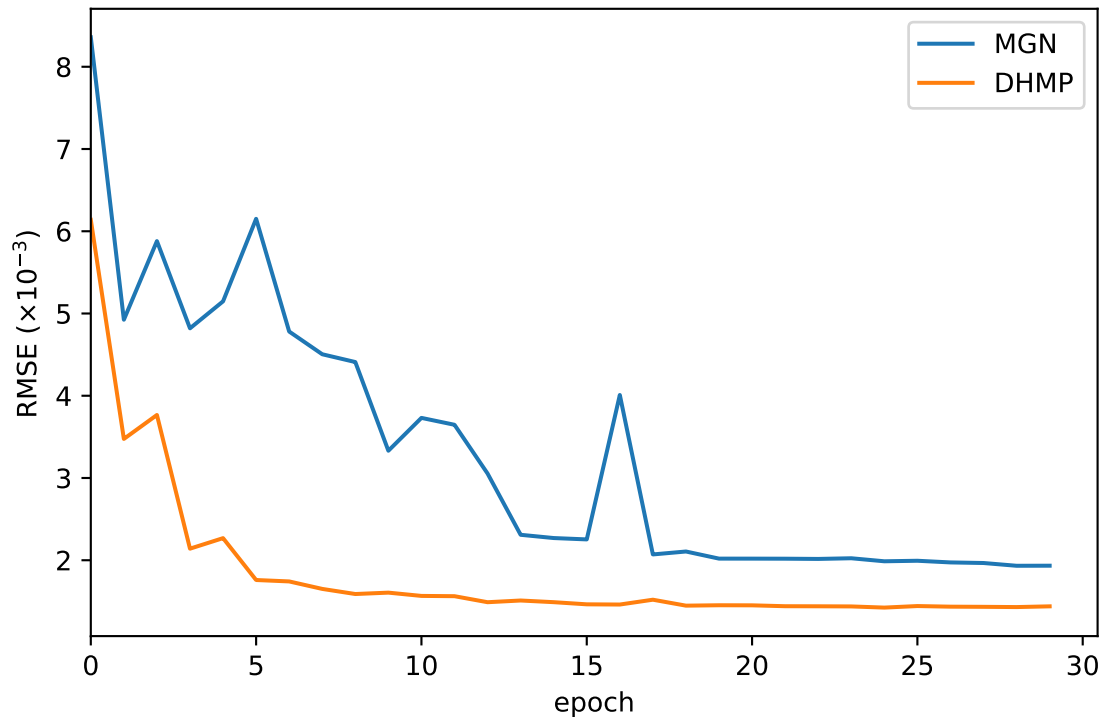

Supplement: supplementary_material [file attachment]
